# Supplementary material
Source: PubMed Central journal article supplement (PMC4591944)
Supplement: supp_the2015-0168_Supplemental_Appendix.pdf [file supp_the2015-0168_Supplemental_Appendix.pdf]

Supplemental Appendix for:  
Patient Attitudes Regarding the Cost of Illness in Cancer Care  
Barry Meisenberg et al.

**Survey on the Financial Impact of Cancer**

Thank you for taking the time to help Anne Arundel Medical Center learn about and better address the concerns of our patients, the individual information you provide will not be shared with anyone other than the survey team. You may get help from a trusted family member or friend if you have difficulty understanding or seeing any of the questions.

Directions: Please answer the following questions.

1. How old are you? \_\_\_\_\_
2. Are you:  
 Male  
 Female
3. Are you:  
 Married  
 Partnered, living together but not married  
 Partnered, not living together  
 Single  
 Divorced  
 Separated
4. With which type of cancer were you diagnosed (breast, colon, pancreatic, etc.)? \_\_\_\_\_
5. When were you diagnosed? (month and year) \_\_\_\_\_
6. What type of treatment have you received/are you receiving? (Check all that apply)  
 Surgery  
 Chemotherapy under the skin or intravenously  
 Oral chemotherapy  
 Radiation  
 Hormone therapy  
 Other (please specify)  
\_\_\_\_\_
7. Do you have:  
 Commercial health insurance (Aetna, Cigna, CareFirst, etc.)  
 Medicare  
 Medicaid  
 No health insurance  
 Other/Not sure (please specify)  
\_\_\_\_\_
8. Including yourself, how many people are in your household \_\_\_\_\_
9. What was your total household income last year?  
 \$0 - \$20,000  
 \$20,001 - \$50,000  
 \$50,001 - \$100,000  
 \$100,001 - \$150,000  
 \$150,001 - \$200,000  
 >\$200,000

10. Approximately how much do you spend “out of pocket” for medical expenses each month? (Include all direct and indirect expenses include parking, baby sitters, medical supplies, over the counter medications) \_\_\_\_\_
11. On a scale of 1-5 with 1 being ***no support***, and 5 being the ***greatest support possible***, how much emotional support would you say you receive from family and friends?
- |                   |   |   |   |                                  |
|-------------------|---|---|---|----------------------------------|
| 1                 | 2 | 3 | 4 | 5                                |
| <b>No Support</b> |   |   |   | <b>Greatest support Possible</b> |
12. On a scale of 1-5, with 1 being ***strongly disagree*** and 5 being ***strongly agree***, how much do you agree with the statement: “I believe being sick will hurt me/has hurt me financially.”
- |                          |   |   |   |                       |
|--------------------------|---|---|---|-----------------------|
| 1                        | 2 | 3 | 4 | 5                     |
| <b>Strongly Disagree</b> |   |   |   | <b>Strongly Agree</b> |
13. On a scale of 1-5, with 1 being ***rarely*** and 5 being ***very frequently*** to what extent have you talked with your primary oncologist about the cost of care?
- |               |   |   |   |                        |
|---------------|---|---|---|------------------------|
| 1             | 2 | 3 | 4 | 5                      |
| <b>Rarely</b> |   |   |   | <b>Very frequently</b> |
14. If you chose 1, 2, or 3 in the previous question, please rank the following reasons in order of importance (with “1” being the ***most important***) for why you have not discussed the cost of care with your doctor
- \_\_\_ I don’t think that’s his/her job
  - \_\_\_ There’s not enough time during clinic visits
  - \_\_\_ I don’t want him/her to think less of me
  - \_\_\_ Don’t want my doctor to change therapies because of cost issues
  - \_\_\_ I don’t think the doctor is concerned about this aspect of care
  - \_\_\_ Other (please specify) \_\_\_\_\_
- 
15. With whom are you most comfortable discussing financial concerns: (Please rank in order with “1” being the ***most comfortable***)
- \_\_\_ Family
  - \_\_\_ Friends
  - \_\_\_ Oncologist
  - \_\_\_ Nurse
  - \_\_\_ Social Worker
  - \_\_\_ Financial Counselor
  - \_\_\_ Other (please specify) \_\_\_\_\_
16. As a result of the cost or lost income of cancer treatments have you: (Choose all that apply)
- \_\_\_ Changed your spending habits (reduced going out to eat, or reduced leisure activities etc.)
  - \_\_\_ Tried to make medications last longer by taking less
  - \_\_\_ Not filled prescriptions
  - \_\_\_ Gotten behind on bills (electric, gas, rent/mortgage)
  - \_\_\_ Increased your debt (credit cards or taken out loans)
  - \_\_\_ Declared bankruptcy
  - \_\_\_ Other (please specify) \_\_\_\_\_
17. On a scale of 1-5, with 1 being ***not well informed*** and 5 being ***extremely well informed***, at the start of your cancer treatment, how well were you informed about the cost of cancer care?
- |   |   |   |   |   |
|---|---|---|---|---|
| 1 | 2 | 3 | 4 | 5 |
|---|---|---|---|---|

- |  |                              |  |                                    |  |
|--|------------------------------|--|------------------------------------|--|
|  | <b>Not<br/>well informed</b> |  | <b>Extremely<br/>well informed</b> |  |
|--|------------------------------|--|------------------------------------|--|
18. On a scale of 1-5 with 1 being ***strongly disagree*** and 5 being ***strongly agree***, how much do you agree with the statement, "Information on personal financial costs of cancer should come from my oncologist."
- |                              |   |   |   |                           |
|------------------------------|---|---|---|---------------------------|
| 1                            | 2 | 3 | 4 | 5                         |
| <b>Strongly<br/>Disagree</b> |   |   |   | <b>Strongly<br/>Agree</b> |
19. On a scale of 1-5 with 1 being ***strongly disagree*** and 5 being ***strongly agree***, how much do you agree with the statement, "My personal financial situation should be a major factor in deciding among treatment options."
- |                              |   |   |   |                           |
|------------------------------|---|---|---|---------------------------|
| 1                            | 2 | 3 | 4 | 5                         |
| <b>Strongly<br/>Disagree</b> |   |   |   | <b>Strongly<br/>Agree</b> |
20. On a scale of 1-5 with 1 being ***strongly disagree*** and 5 being ***strongly agree***, how much do you agree with the statement, "If there were more than one treatment plan that were roughly the same in terms of effectiveness, I would want my doctor to prescribe the less costly one for me."
- |                              |   |   |   |                           |
|------------------------------|---|---|---|---------------------------|
| 1                            | 2 | 3 | 4 | 5                         |
| <b>Strongly<br/>Disagree</b> |   |   |   | <b>Strongly<br/>Agree</b> |
21. On a scale of 1-5 with 1 being ***strongly disagree*** and 5 being ***strongly agree***, how much do you agree with the statement, "Overall costs to society should be a major factor in deciding among treatment options."
- |                              |   |   |   |                           |
|------------------------------|---|---|---|---------------------------|
| 1                            | 2 | 3 | 4 | 5                         |
| <b>Strongly<br/>Disagree</b> |   |   |   | <b>Strongly<br/>Agree</b> |

**Personal Financial Wellness Scale©**

**Directions:** Circle or check the responses that are ***most appropriate*** for your situation.

22. What do you feel is the ***level*** of your ***financial stress today?***
- |                     |   |   |             |   |            |   |   |                  |    |
|---------------------|---|---|-------------|---|------------|---|---|------------------|----|
| 1                   | 2 | 3 | 4           | 5 | 6          | 7 | 8 | 9                | 10 |
| Overwhelming Stress |   |   | High Stress |   | Low Stress |   |   | No Stress at All |    |

23. On the stair steps below, mark (with a circle) how ***satisfied*** you are with your ***present financial situation.*** The "1" at the bottom of the steps represents complete dissatisfaction. The "10" at the top of the stair steps represents complete satisfaction. The more dissatisfied you are, the lower the number you should circle. The more satisfied you are, the higher the number you should circle.

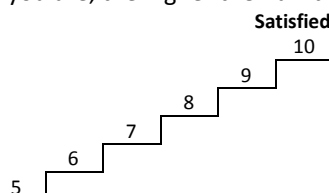

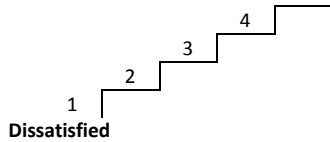

24. How do you feel about your ***current financial situation?***

|                  |   |                        |   |   |   |             |   |                  |    |
|------------------|---|------------------------|---|---|---|-------------|---|------------------|----|
| 1                | 2 | 3                      | 4 | 5 | 6 | 7           | 8 | 9                | 10 |
| Feel Overwhelmed |   | Sometimes Feel Worried |   |   |   | Not Worried |   | Feel Comfortable |    |

25. How often do you worry about being ***able to meet*** normal monthly living expenses?

|                    |   |                 |   |   |   |              |   |             |    |
|--------------------|---|-----------------|---|---|---|--------------|---|-------------|----|
| 1                  | 2 | 3               | 4 | 5 | 6 | 7            | 8 | 9           | 10 |
| Worry All the Time |   | Sometimes Worry |   |   |   | Rarely Worry |   | Never Worry |    |

26. How confident are you that you could find the money to pay for a ***financial emergency*** that costs about ***\$1,000?***

|               |   |                   |   |   |   |                 |   |                 |    |
|---------------|---|-------------------|---|---|---|-----------------|---|-----------------|----|
| 1             | 2 | 3                 | 4 | 5 | 6 | 7               | 8 | 9               | 10 |
| No Confidence |   | Little Confidence |   |   |   | Some Confidence |   | High Confidence |    |

27. How often does this happen to you? You want to go out to eat, go to a movie or do something else and ***don't go because you can't afford to?***

|              |   |           |   |   |   |        |   |       |    |
|--------------|---|-----------|---|---|---|--------|---|-------|----|
| 1            | 2 | 3         | 4 | 5 | 6 | 7      | 8 | 9     | 10 |
| All the time |   | Sometimes |   |   |   | Rarely |   | Never |    |

28. How frequently do you find yourself just getting by financially and living ***paycheck to paycheck?***

|              |   |           |   |   |   |        |   |       |    |
|--------------|---|-----------|---|---|---|--------|---|-------|----|
| 1            | 2 | 3         | 4 | 5 | 6 | 7      | 8 | 9     | 10 |
| All the time |   | Sometimes |   |   |   | Rarely |   | Never |    |

29. How ***stressed*** do you feel about your personal finances ***in general?***

|                     |   |             |   |   |   |            |   |                  |    |
|---------------------|---|-------------|---|---|---|------------|---|------------------|----|
| 1                   | 2 | 3           | 4 | 5 | 6 | 7          | 8 | 9                | 10 |
| Overwhelming Stress |   | High Stress |   |   |   | Low Stress |   | No Stress at All |    |

©Copyright 2004, 2005, 2006. All rights reserved.
